# Supplementary figures and images for: Integrated Metabolome and Transcriptome Analysis of Petal Anthocyanin Accumulation Mechanism in Gloriosa superba ‘Rothschildiana’ during Different Flower Development Stages
Source: MDPI journal article supplement (doi:10.3390/ijms242015034), 2023-10-10

Module-Traits Relationships

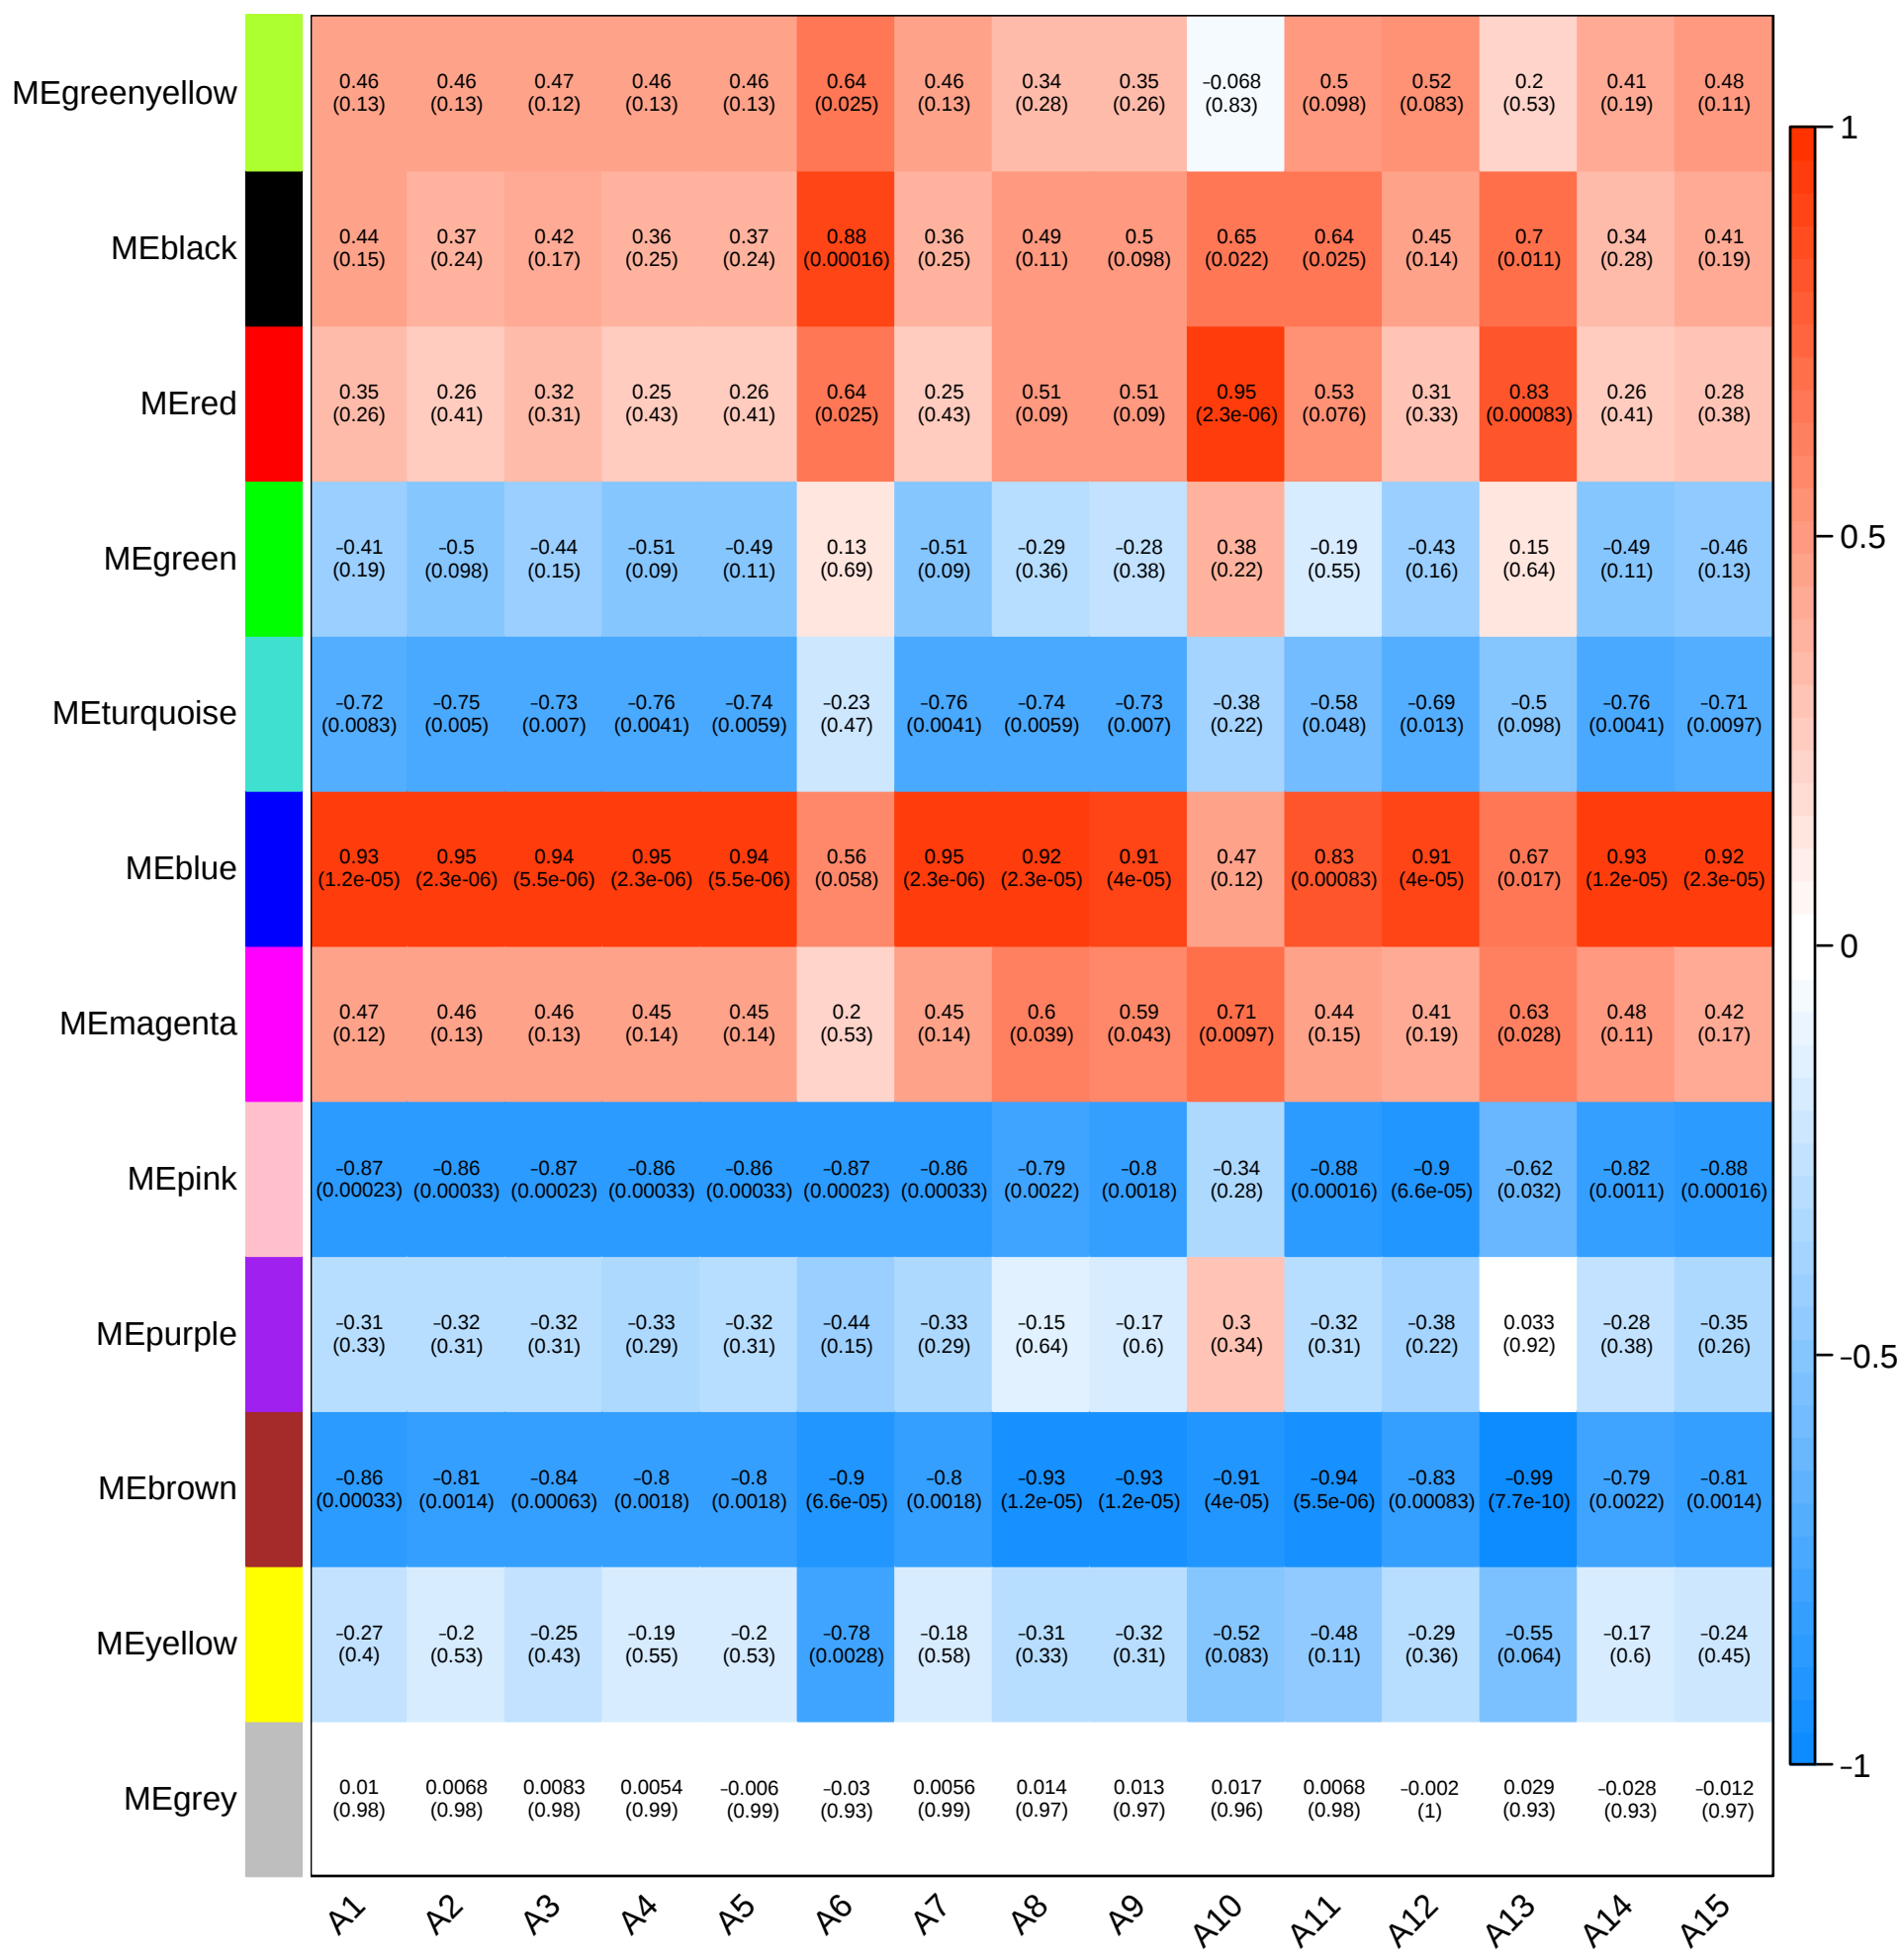

Supplement: s1 [file s1]

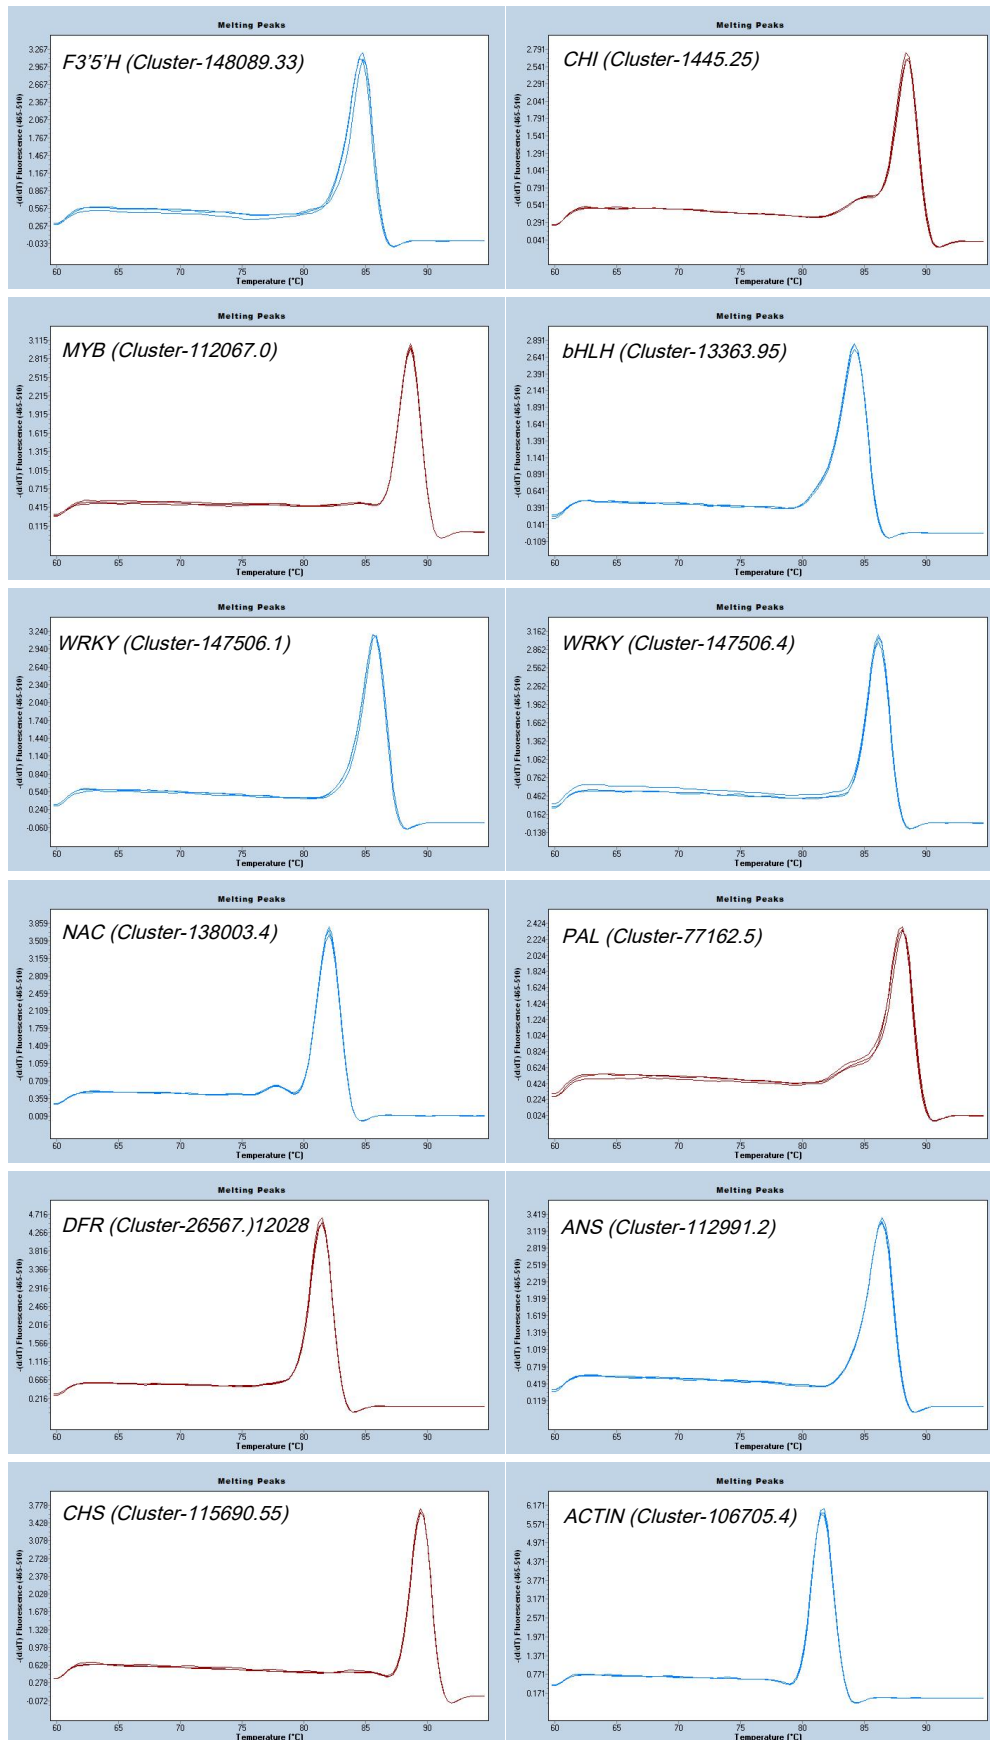

Supplement: s1 [file s1]

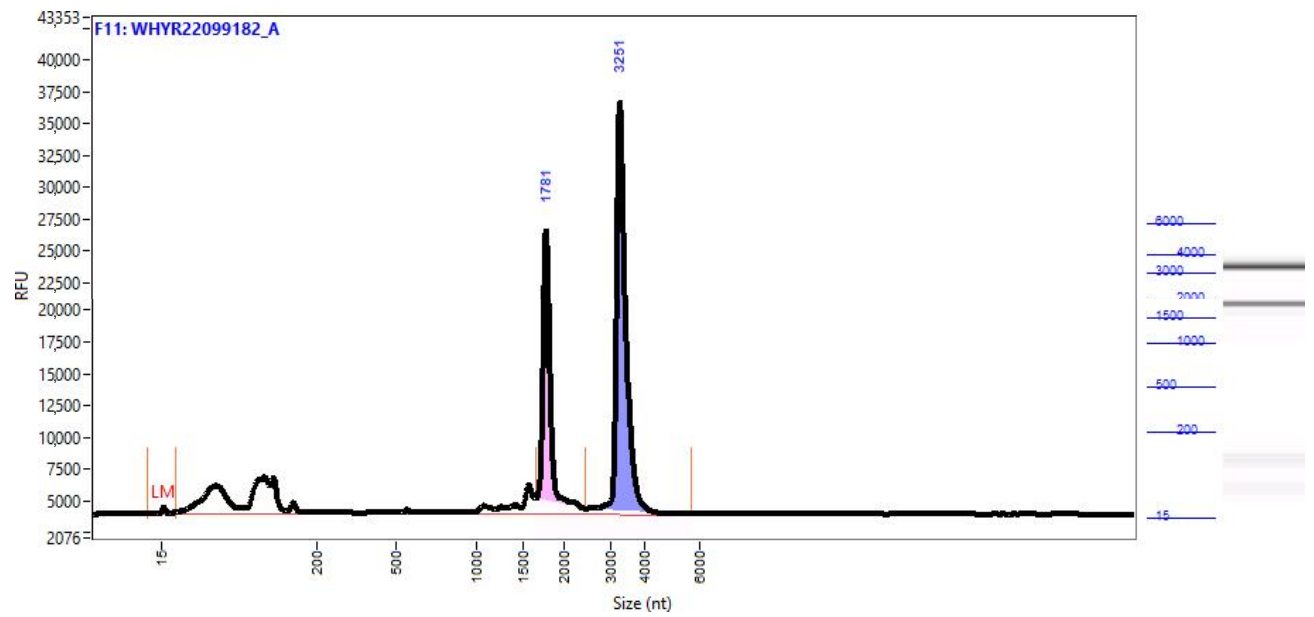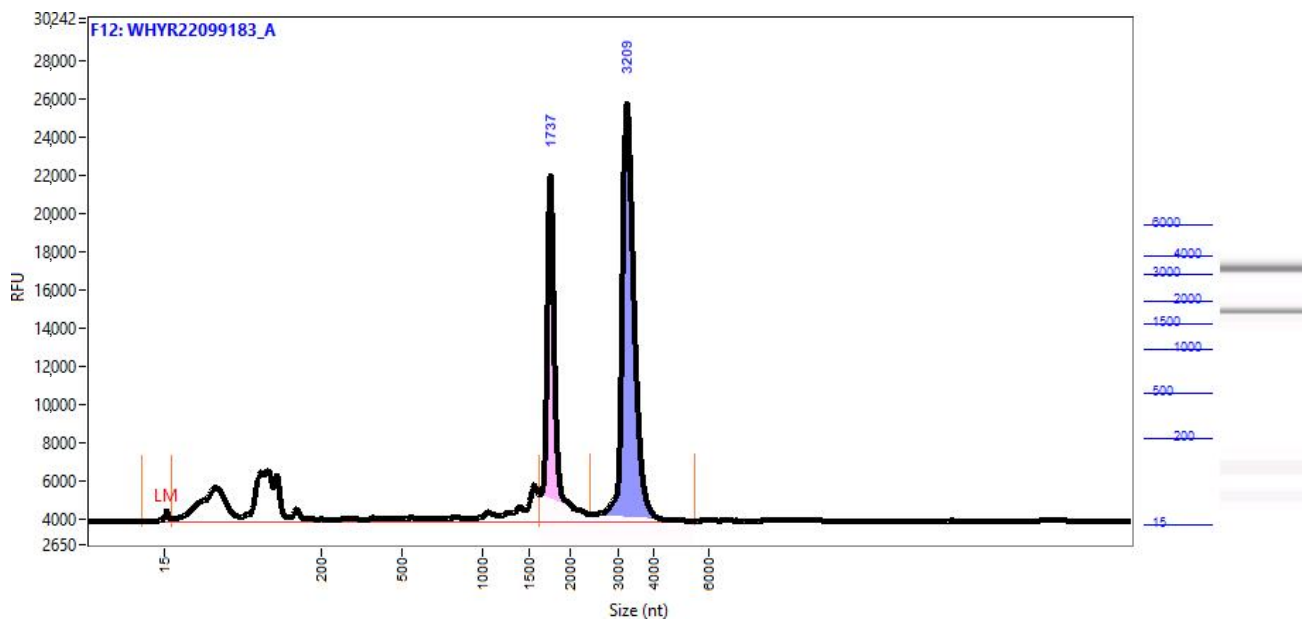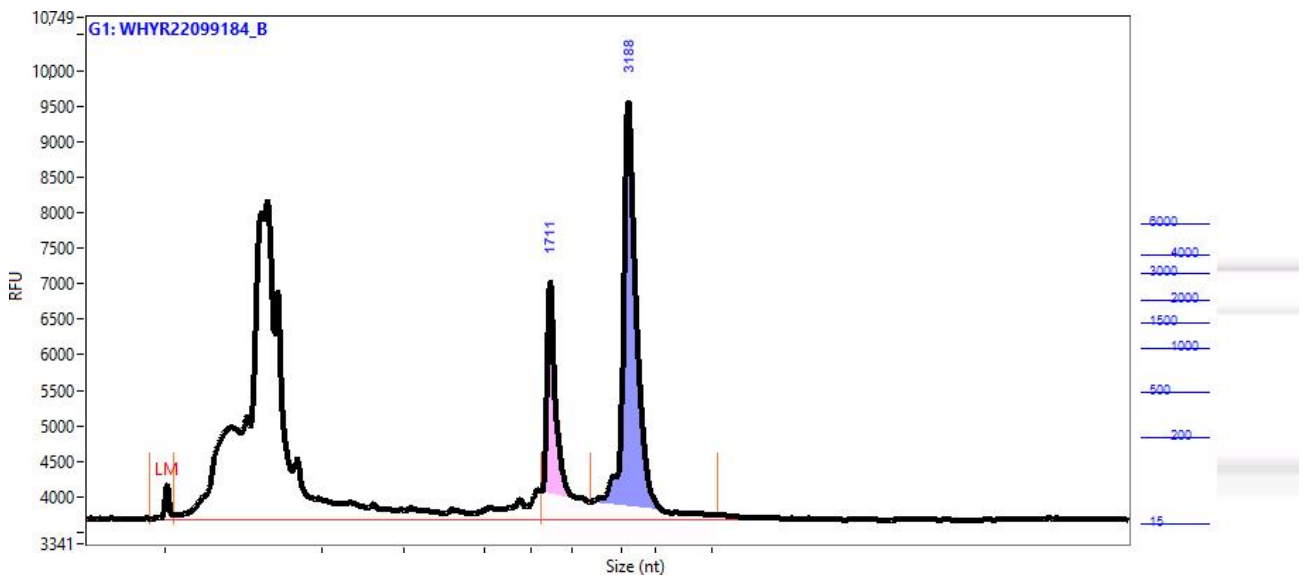

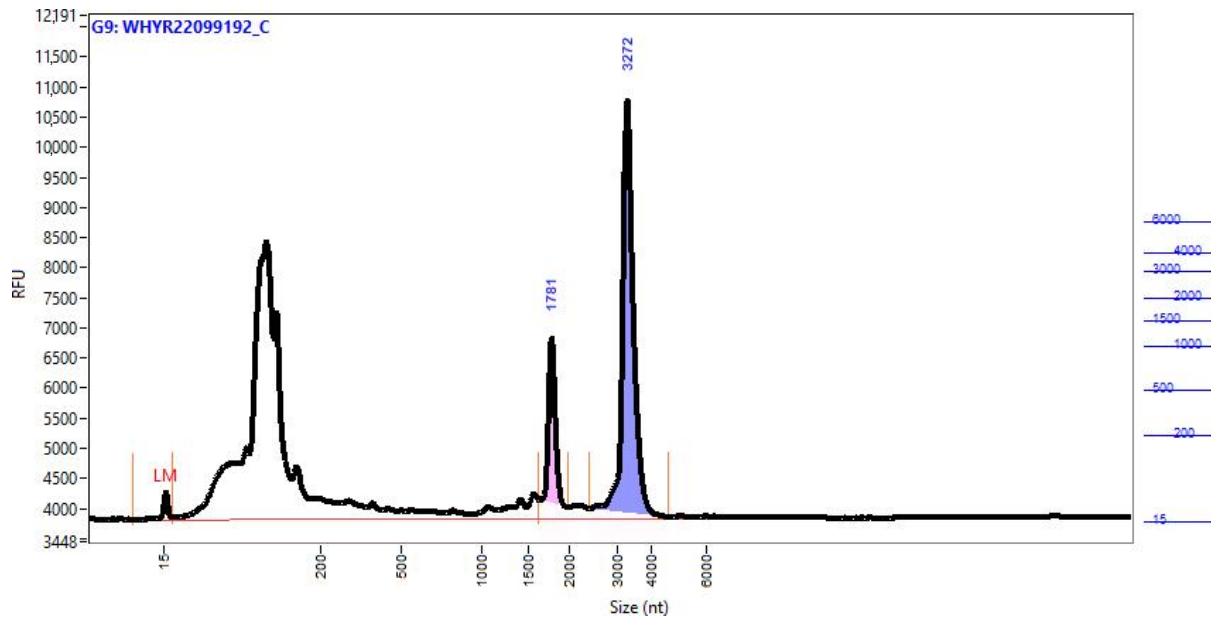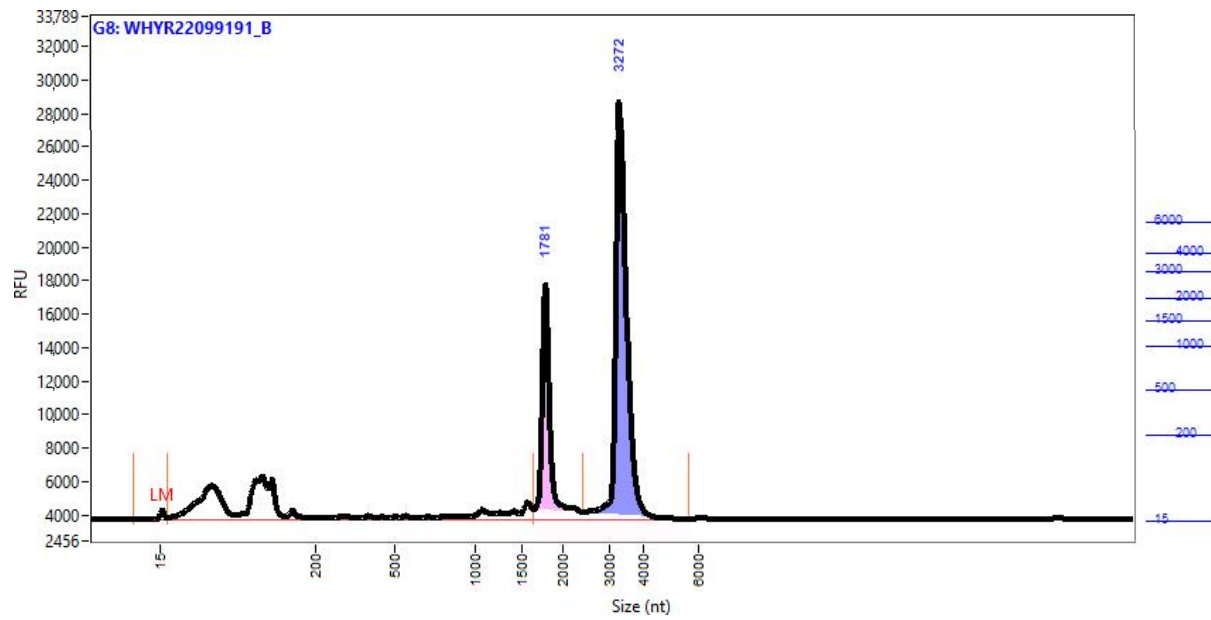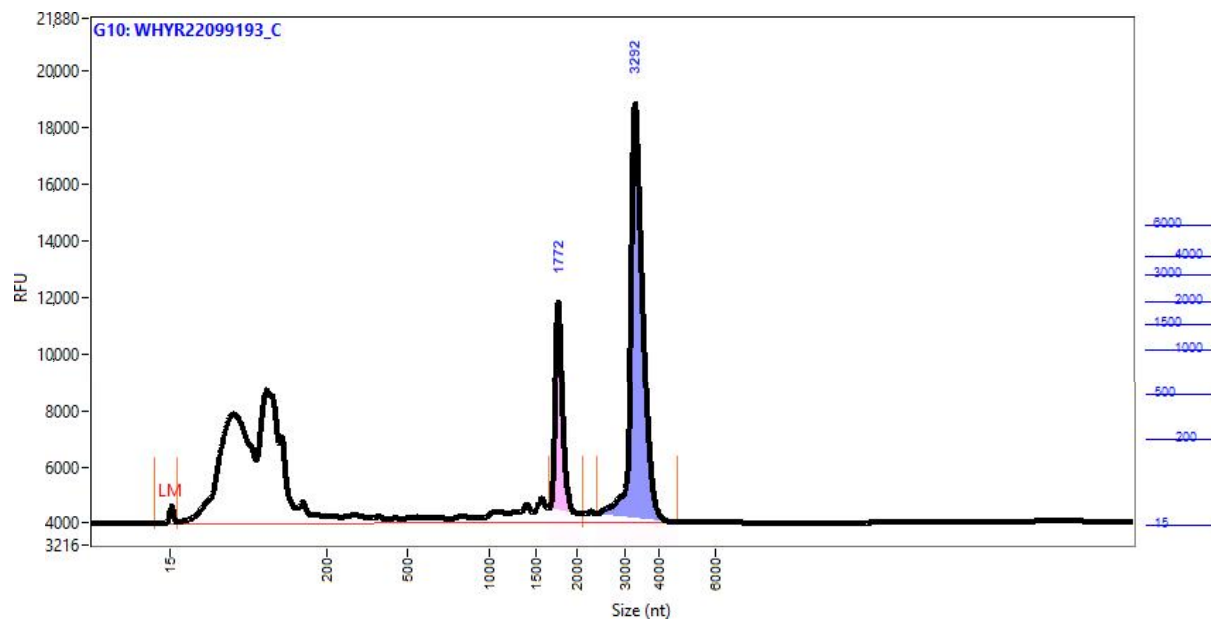

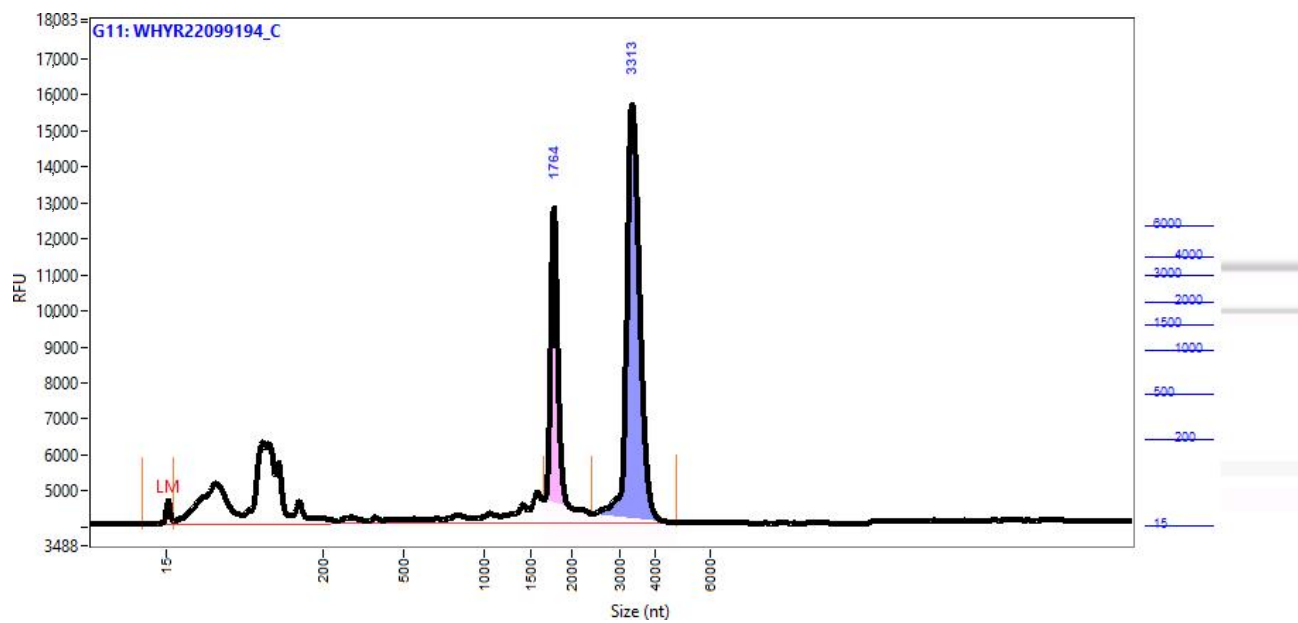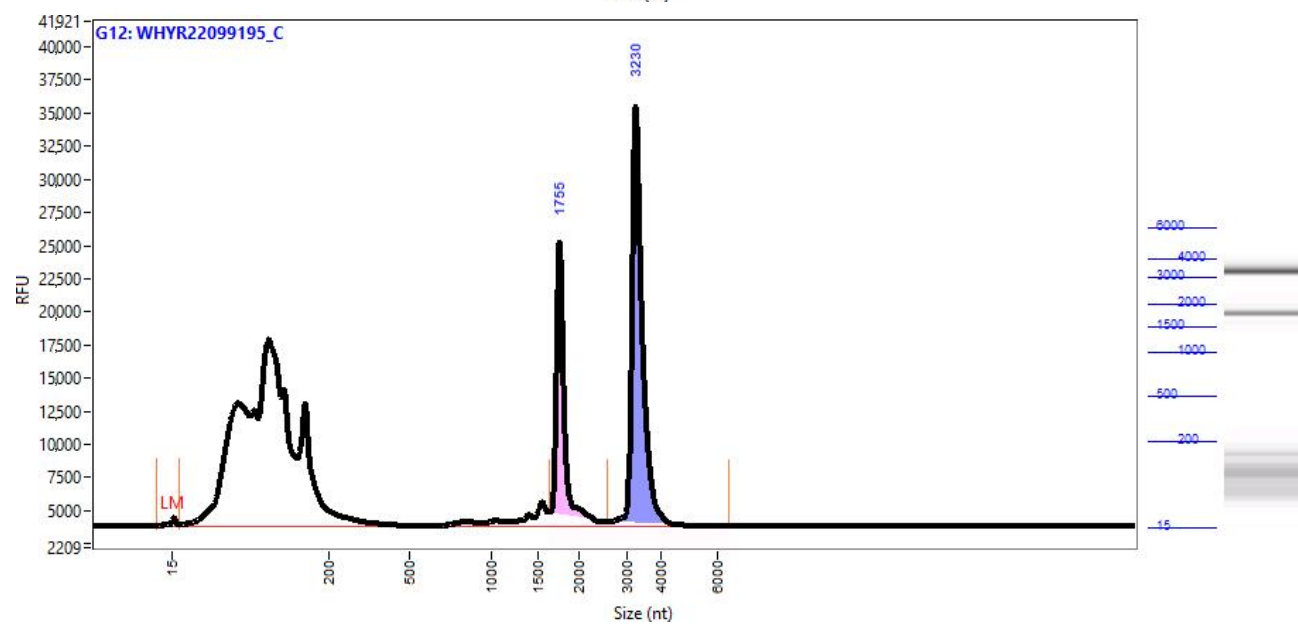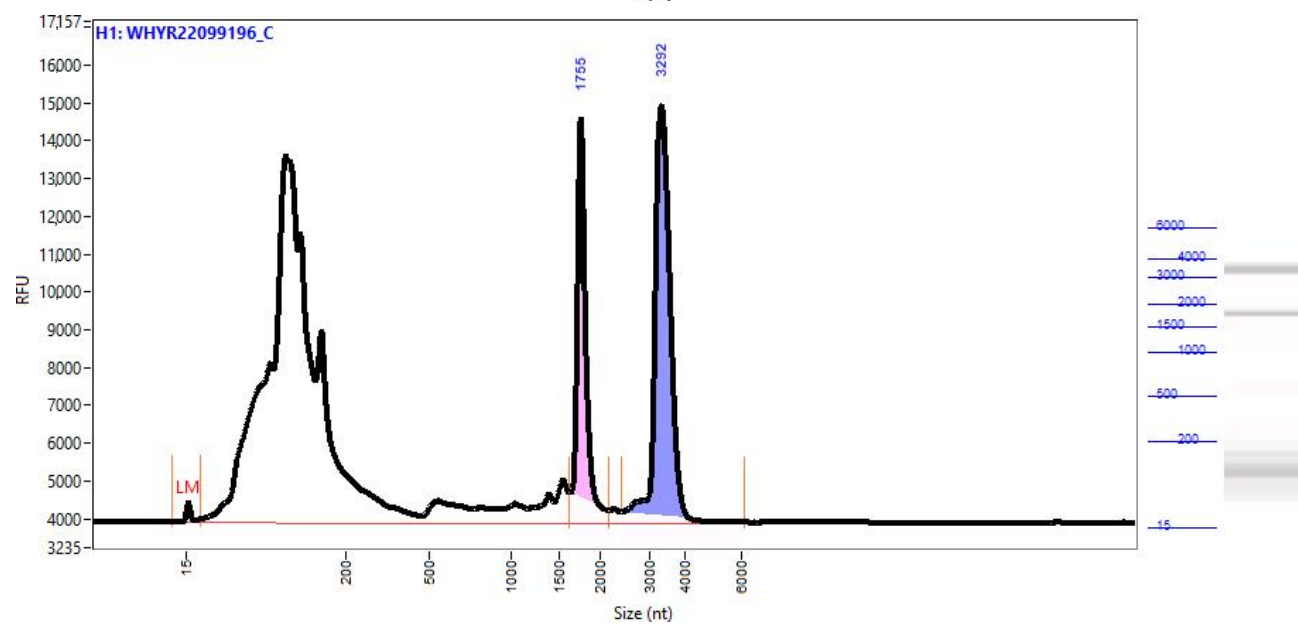

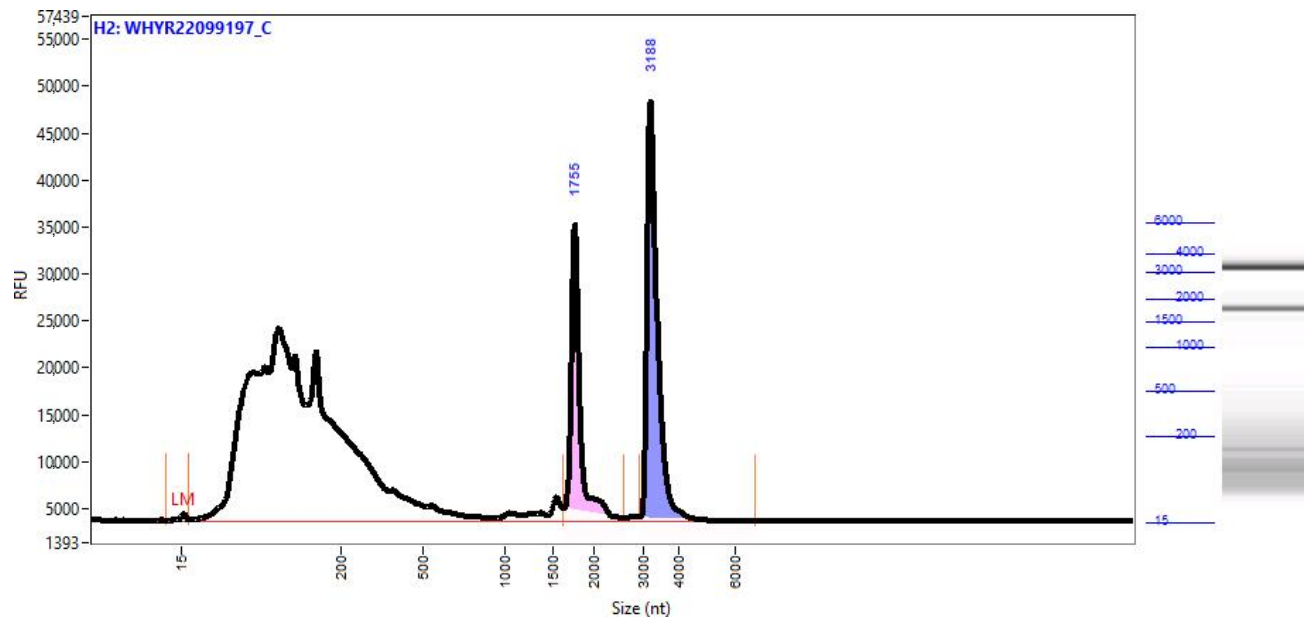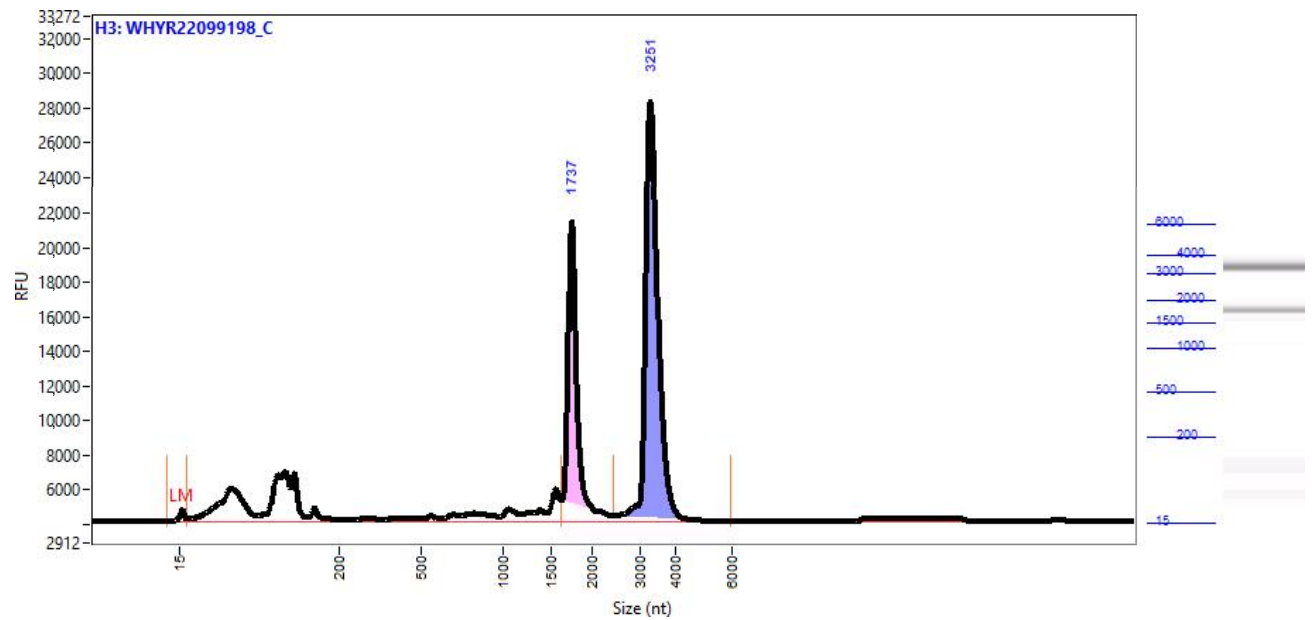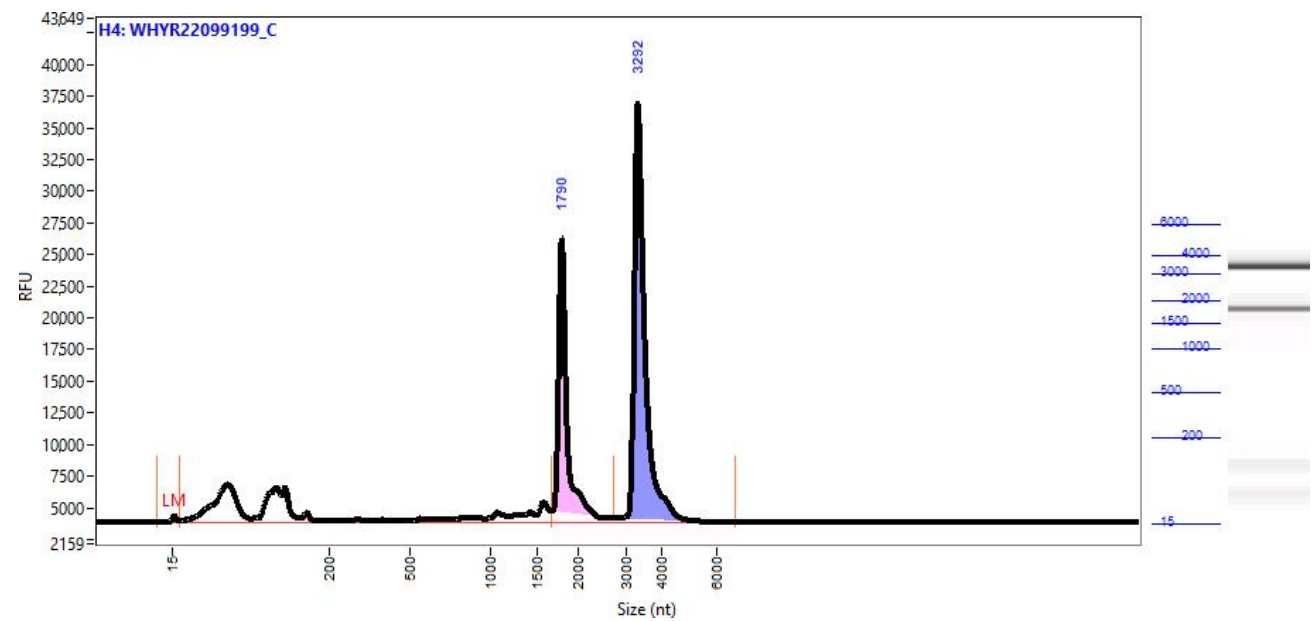

Supplement: s1 [file s1]
